# Supplementary material for: HIV-1 neutralizing antibodies elicited in humans by a prefusion-stabilized envelope trimer form a reproducible class targeting fusion peptide
Source: PubMed Central journal article supplement (PMC10491024; doi:10.1016/j.celrep.2023.112755), 2023-07-11
Supplement: NIHMS1920497-supplement-1.pdf [file NIHMS1920497-supplement-1.pdf]

**Supplemental information**

**HIV-1 neutralizing antibodies elicited in humans  
by a prefusion-stabilized envelope trimer form  
a reproducible class targeting fusion peptide**

**Shuishu Wang, Flavio Matassoli, Baoshan Zhang, Tracy Liu, Chen-Hsiang Shen, Tatsiana Bylund, Timothy Johnston, Amy R. Henry, I-Ting Teng, Prabhanshu Tripathi, Jordan E. Becker, Anita Changela, Ridhi Chaudhary, Cheng Cheng, Martin Gaudinski, Jason Gorman, Darcy R. Harris, Myungjin Lee, Nicholas C. Morano, Laura Novik, Sijy O'Dell, Adam S. Olia, Danealle K. Parchment, Reda Rawi, Jesmine Roberts-Torres, Tyler Stephens, Yaroslav Tsybovsky, Danyi Wang, David J. Van Wazer, Tongqing Zhou, Nicole A. Doria-Rose, Richard A. Koup, Lawrence Shapiro, Daniel C. Douek, Adrian B. McDermott, and Peter D. Kwong**

### A Env trimers used for B cell sorting and antibody-binding analyses

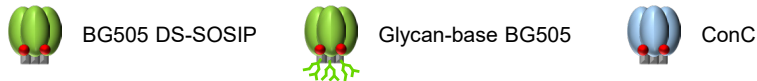

### B Glycan-base BG505 design and characterization

Glycan-base BG505 sequence - relative to BG505 DS-SOSIP, additional stabilizing mutations and two *N*-glycans at trimer base

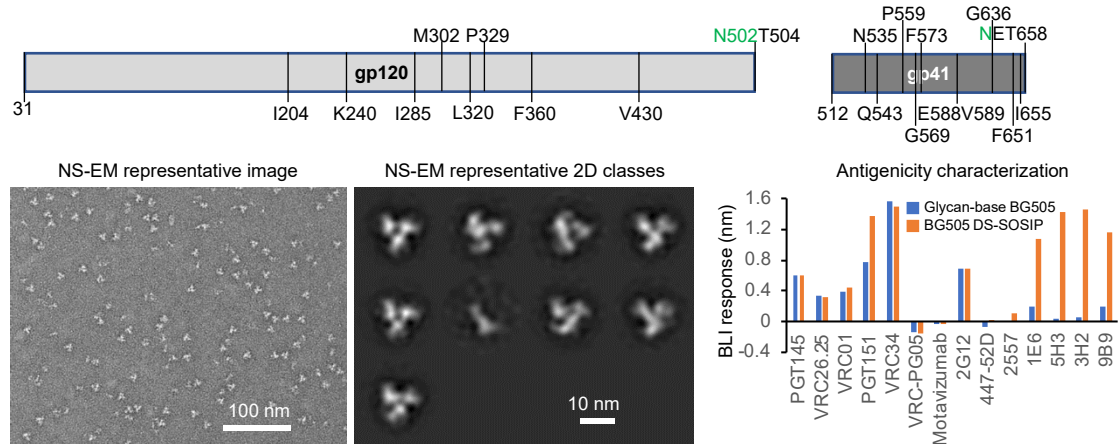

### C Sorting gates

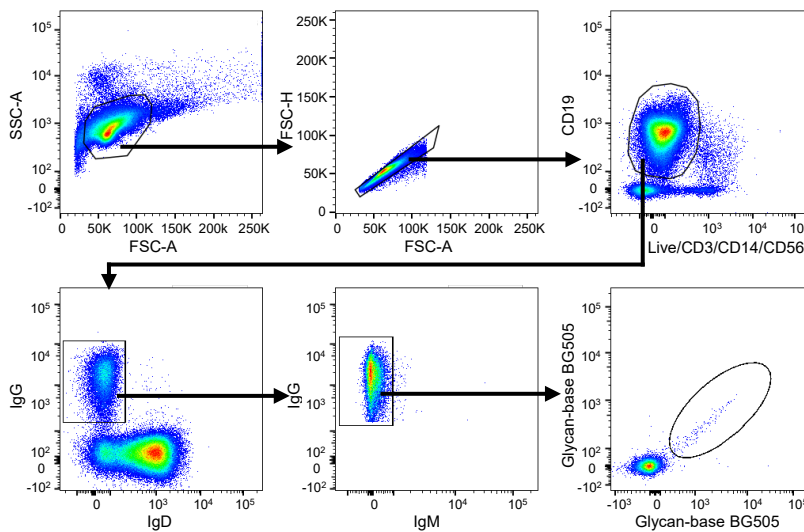

### D Staining of IgG+ cells

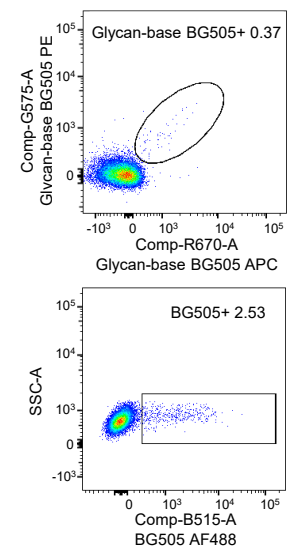

**Figure S1. Env trimers and B cell sorting details, related to Figure 1.**

(A) Env trimers used for B cell sorting and binding analyses with AlphaLISA, BLI, and SPR.

(B) The probe glycan-base BG505 was designed based on BG505 DS-SOSIP with additional mutations to stabilize the trimer in prefusion-closed conformation and two additional *N*-glycans to cover the trimer base. Negative stain (NS) EM revealed well-formed trimers, but with some monomeric shape present. Glycan-base BG505 bound most antibodies similarly to BG505 DS-SOSIP, except for the base-directed antibodies 1E6, 5H3, 3H2, and 9B9, to which it had negligible affinity.

(C) Details of B cell sorting gate strategy.

(D) Cytometry of IgG+ B cells from N751 serum. Cells were stained first with glycan-base BG505 to allow all non-base directed B cells to engage first in the trimer, washed the cells, and then stained with BG505 to allow the base-specific B cells to engage. BG505+ cell population is much larger than glycan-base BG505+ cell population. The glycan-base BG505-positive cells account for 0.37% of IgG+ memory B cells (Singlet, Live, CD19+, CD3-, CD14-, CD56-, IgG+) (upper panel). After absorption with glycan-base BG505, 2.53% of IgG+ memory B cells bind BG505 DS-SOSIP trimer (lower panel). Glycan-base BG505+ cells are 12.89% of all antigen-specific memory B cells, and the other 87.11% are likely targeting the trimer base.

### A Pseudovirus neutralization assessments for 2D02 and 1B06

| Viral strains | IC50 $\mu\text{g/ml}$ |              |                    | IC80 $\mu\text{g/ml}$ |              |                    |
|---------------|-----------------------|--------------|--------------------|-----------------------|--------------|--------------------|
|               | MW965.26              | BG505.W6M.C2 | BG505.W6M.C2.N611Q | MW965.26              | BG505.W6M.C2 | BG505.W6M.C2.N611Q |
| Clade         | C                     | A            |                    | C                     | A            |                    |
| 2D02 IgG      | >50                   | >50          | >50                | >50                   | >50          | >50                |
| 1B06 IgG      | >50                   | >50          | >50                | >50                   | >50          | >50                |

### B Neutralization assessments against a panel of viruses neutralized by most fusion peptide-directed antibodies

| Viral strains         | Clade         | BG505.W6M.C2.N611Q | BG505.W6M.C2 | HxB2.D.G | KER200.8.12 | MB201.A1 | MI369.A5 | 96ZM6.51.02 | CNE40 | Q23.17 | CH117.4 | 3468.V.1.C12 | 3365.v2.c20 | 2M135.10a | BI369.9A | 0815.v.3.c3 | CNE19 |
|-----------------------|---------------|--------------------|--------------|----------|-------------|----------|----------|-------------|-------|--------|---------|--------------|-------------|-----------|----------|-------------|-------|
|                       |               | A                  | A            | B        | A           | A        | A        | C           | BC    | A      | BC      | AD           | A           | C         | A        | ACD         | BC    |
| IC50 $\mu\text{g/ml}$ | 2C06 IgG      | 2.92               | 33.6         | >100     | >100        | >100     | >100     | >100        | >100  | >100   | >100    | >100         | >100        | >100      | >100     | >100        | >100  |
|                       | 2C09 IgG      | 2.07               | 44.2         | >100     | >100        | >100     | >100     | >100        | >100  | >100   | >100    | >100         | >100        | >100      | >100     | >100        | >100  |
|                       | N123-VRC34.01 | 0.017              | 0.116        | 0.254    | 0.082       | 0.072    | 0.155    | 0.121       | 0.214 | 0.173  | 0.062   | 1.11         | 0.050       | >100      | 0.134    | 0.039       | 0.035 |
| IC80 $\mu\text{g/ml}$ | 2C06 IgG      | 10.4               | >100         | >100     | >100        | >100     | >100     | >100        | >100  | >100   | >100    | >100         | >100        | >100      | >100     | >100        | >100  |
|                       | 2C09 IgG      | 10.9               | >100         | >100     | >100        | >100     | >100     | >100        | >100  | >100   | >100    | >100         | >100        | >100      | >100     | >100        | >100  |
|                       | N123-VRC34.01 | 0.084              | 0.641        | 1.05     | 0.317       | 0.323    | 1.03     | 0.414       | 0.832 | 1.21   | 0.604   | >100         | 0.194       | >100      | 1.25     | 0.14        | >100  |

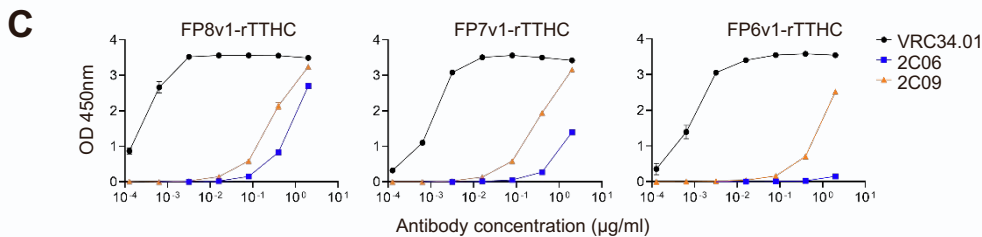

### D Competition ELISA of 2C06 and 2C09 binding to BG505 DS-SOSIP with fusion peptide and base-binding antibodies

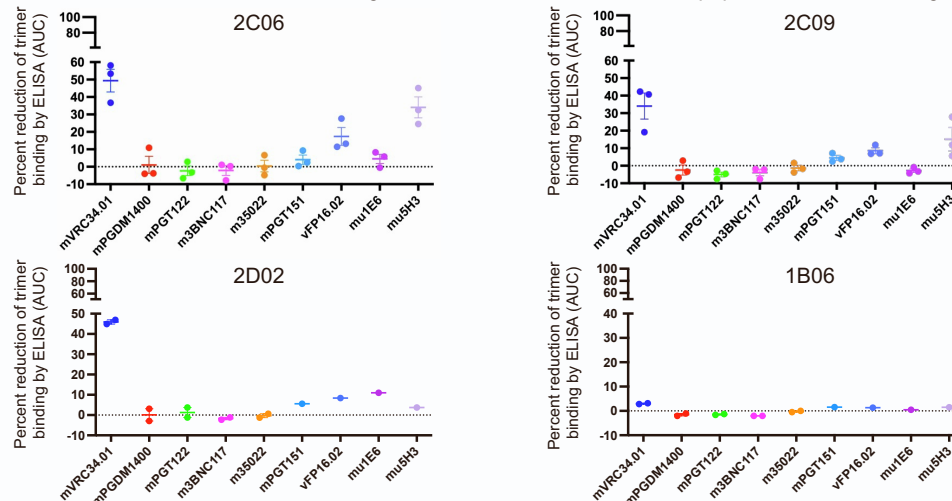

### E Neutralization assessments against BG505.S241N as well as against all strains in 208-strain panel lacking a glycan at residue 241

| Viral strains         | BG505.S241N | 0077.v1 | 3168.v4 | 6471.v1 | 25710-strains |      |      |       |
|-----------------------|-------------|---------|---------|---------|---------------|------|------|-------|
|                       | CNE56       | 929-28  | T257-31 | .c16    | .c10          | .c16 | 2.43 |       |
| Tier                  | 2           | 2       | 2/3     | 2       | 3             | 1B/2 |      |       |
| Clade                 | A           | AE      | AG      | AG      | C             | C    | C    |       |
| IC50 $\mu\text{g/ml}$ | 2C06        | >100    | >100    | >100    | >100          | >100 | >100 |       |
|                       | 2C09        | >100    | >100    | >100    | >100          | >100 | >100 |       |
|                       | VRC34.01    | 0.758   | >100    | >100    | 1.48          | 11.5 | >100 | 0.366 |
| IC80 $\mu\text{g/ml}$ | 2C06        | >100    | >100    | >100    | >100          | >100 | >100 |       |
|                       | 2C09        | >100    | >100    | >100    | >100          | >100 | >100 |       |
|                       | VRC34.01    | 4.610   | >100    | >100    | >100          | 65.6 | >100 |       |

**Figure S2. Binding and neutralization data, related to Figures 1, 5, and 6.**

(A) Neutralization assessments for 2D02 and 1B06 revealed no detectable neutralization activity.

(B) Neutralization assessments of VRC 018-elicited antibodies from donor N751 against a panel of viruses neutralized by most fusion peptide-directed antibodies.

(C) ELISA analysis of 2C06 and 2C09 IgG binding to fusion peptide. Measurements were carried out in triplicates, and mean and SE are reported for each data point.

(D) Competition ELISA revealed 2C06, 2C09, and 2D02 competed for binding to BG505 DS-SOSIP trimer with fusion peptide-directed antibodies and base binding antibody 1E6 or 5H3, whereas 1B06 did not compete with any antibody tested.

(E) Neutralization assessments focusing on strains in 208-strain panel lacking a glycan at residue 241.

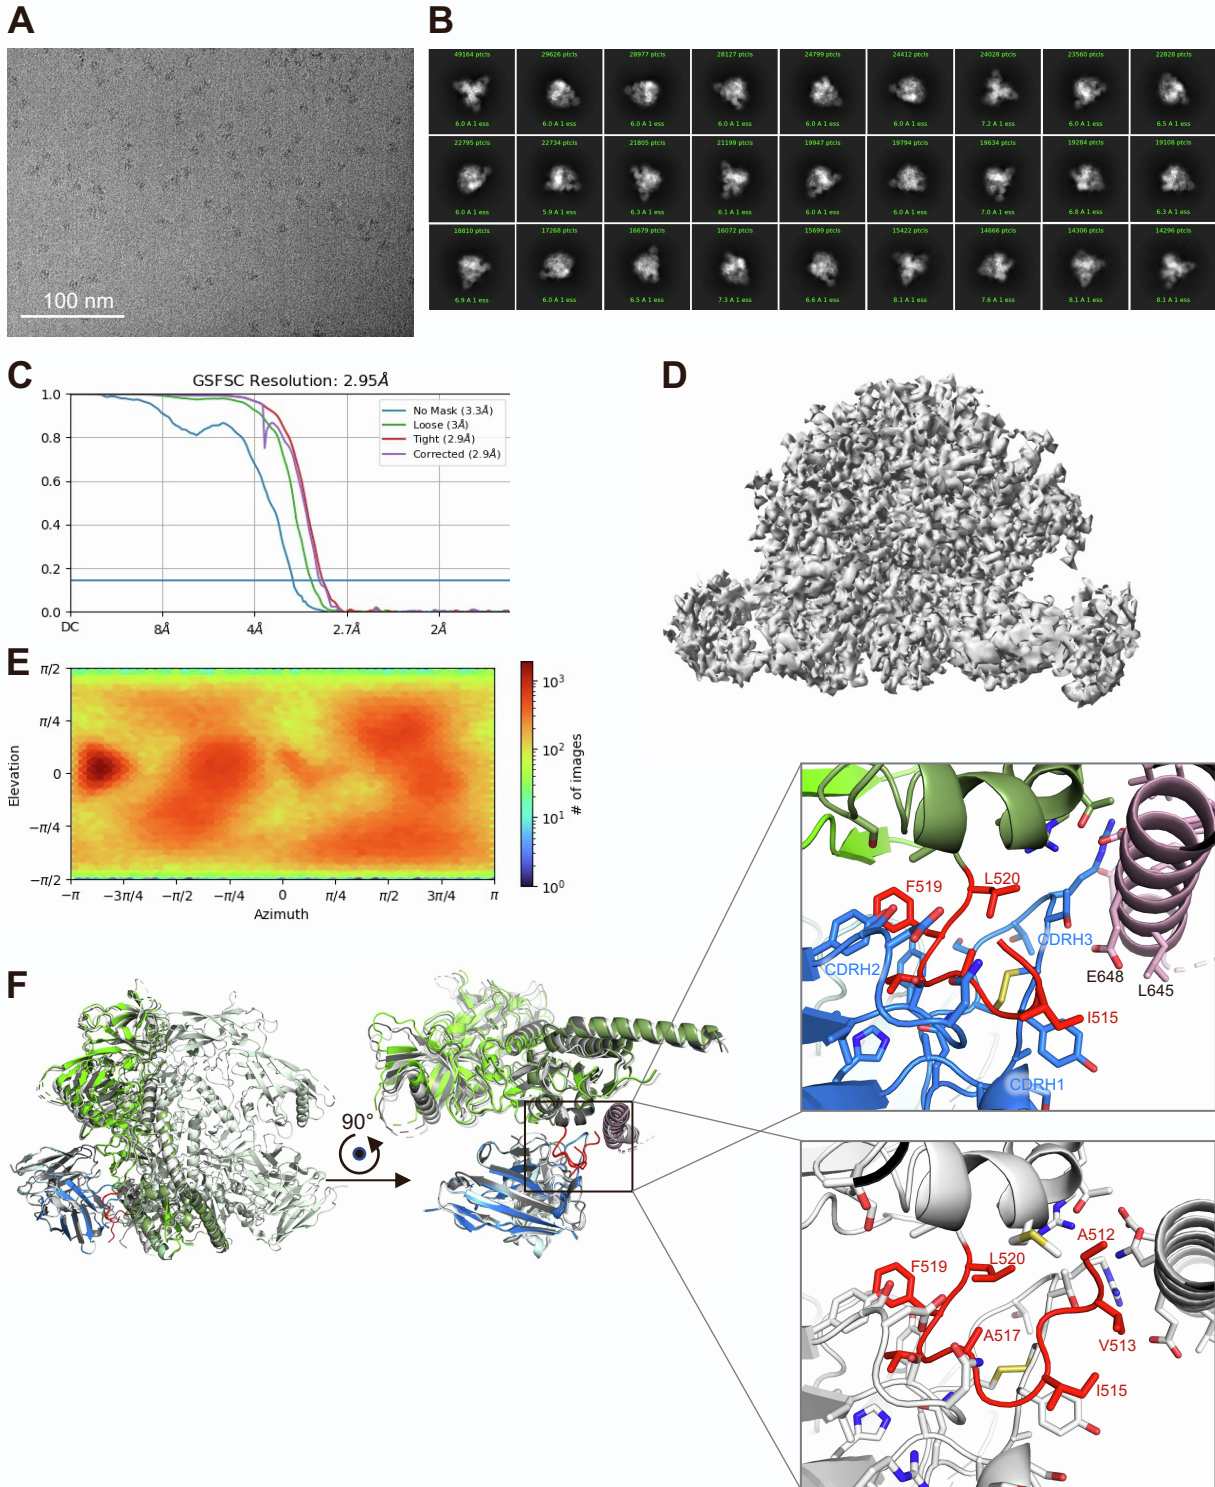

**Figure S3. Cryo-EM validation for 2C06 in complex with BG505 DS-SOSIP, related to Figure 2.**

(A) Representative micrograph. (B) 2D classes. (C) Fourier shell correlation (FSC) curves showing gold-standard FSC resolution at 2.95 Å. (D) 3D reconstruction density map at 2.95 Å from non-uniform refinement with C1 symmetry, showing antibody Fab binding near the trimer base at the fusion peptide-site of vulnerability. (E) Orientations of all particles used in the final refinement shown as a heatmap. (F) Superposition of three protomers revealing the trimer asymmetry induced by 2C06 binding. (Left) Protomers in right and back are superimposed on the one in left. (Middle) A 90° rotation of the left image to put the superimposed antibody chains at the bottom. Only the superimposed protomers are shown. One protomer is shown in colors, and the other two are in light or dark gray. (Right) Zoom-in views showing two slightly different modes of binding. The helix on the right is from a neighboring protomer.

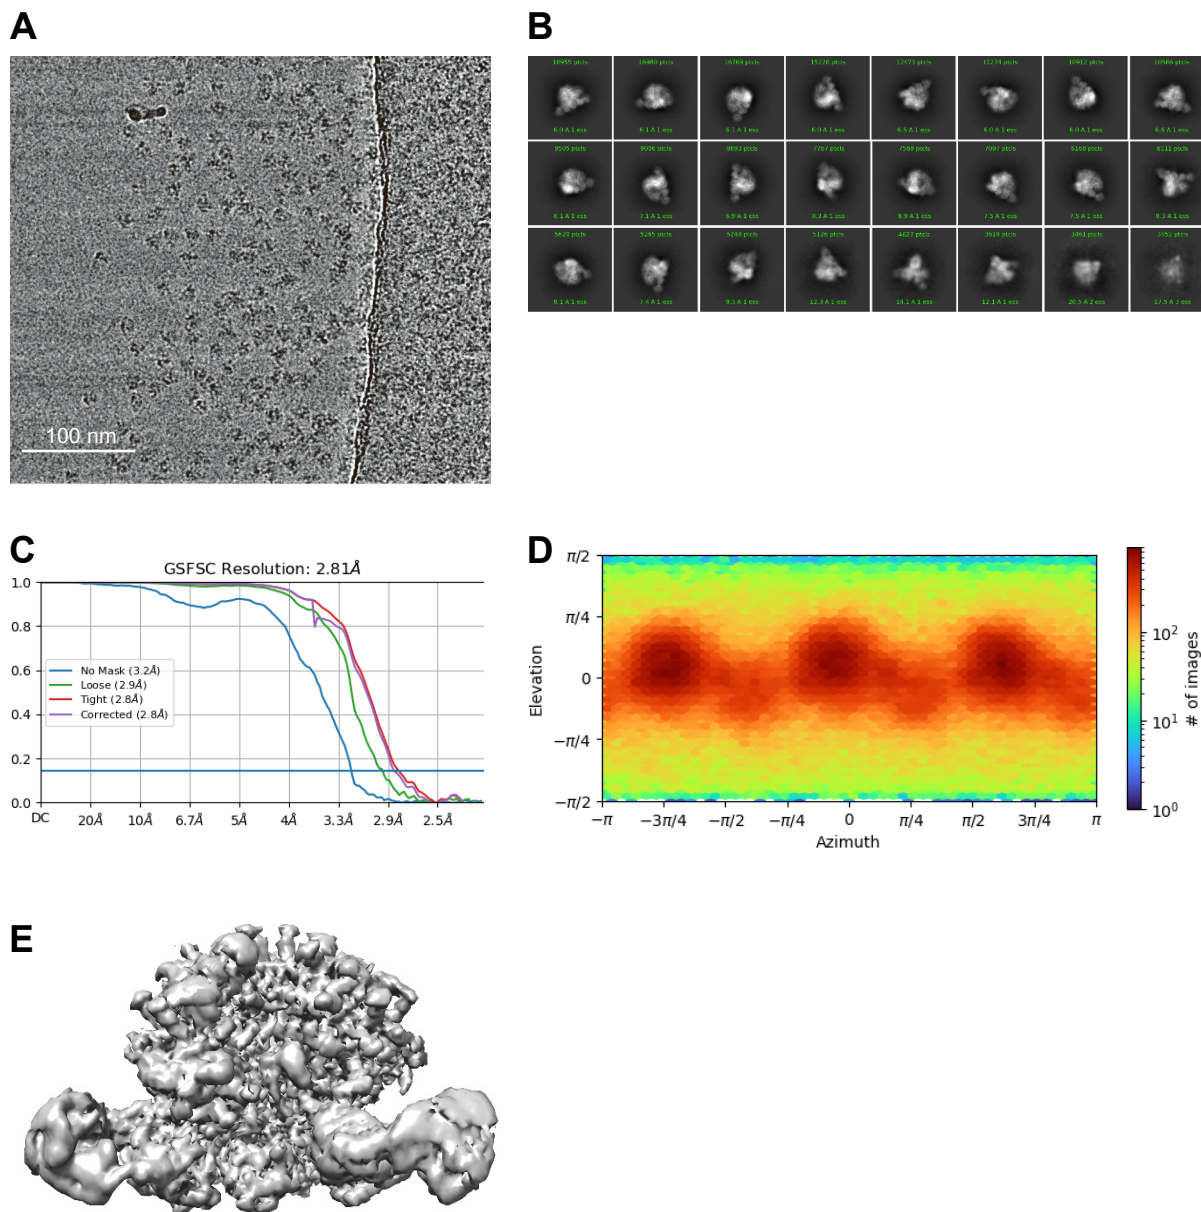

**Figure S4. Cryo-EM validation for 2C09 in complex with BG505 DS-SOSIP, related to Figure 3.**

(A) Representative micrograph. (B) 2D classes. (C) Fourier shell correlation (FSC) curves showing gold-standard FSC resolution at 2.81 Å. (D) Orientations of all particles used in the final refinement shown as a heatmap. (E) 3D reconstruction density map at 2.81 Å from non-uniform refinement with C3 symmetry, showing antibody Fab binding near the trimer base at the fusion peptide-site of vulnerability.

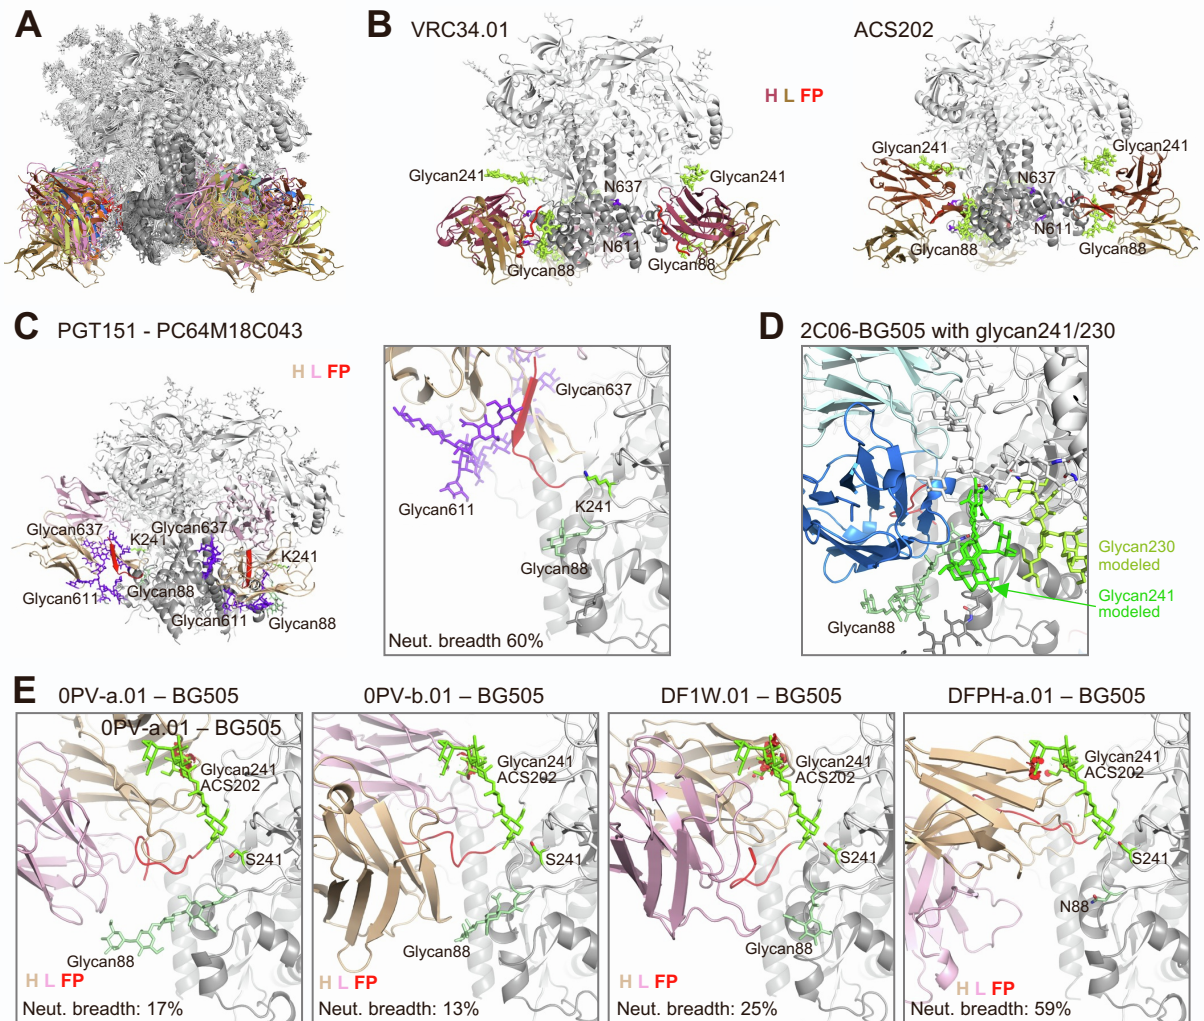

**Figure S5. Fusion peptide-directed antibodies (except for PGT151) bind at a similar location and interact favorably with glycan88 but variably with glycan241, related to Figure 5.**

(A) Structural superposition of fusion peptide-directed antibodies in complex with Env trimer. The structures, 2C06, 2C09, ACS202 (PDB: 6nc2), VRC34.01 (PDB: 6nc3), DFPH-a.01 (modeled based on DFPH-a.15 structure, PDB: 6n1w), DF1W-a.01 (PDB: 6mph), A12V163-a.01 (PDB: 6n1v), A12V163-b.01 (PDB: 6mpg), 0PV-a.01 (PDB: 6osy), 0PV-b.01 (PDB: 6ot1), 0PV-c.01 (PDB: 6nf2), and vFP16.02 (PDB: 6cdi), were aligned by one of the gp120 subunits (right).

(B) Binding of VRC34.01 and ACS202 involves both glycan88 and glycan241 (green sticks), but not glycan611 or glycan637, both not modeled in the structure, likely disordered. VRC34.01 and ACS202 bind in a similar location but with different orientations.

(C) PGT151 (PDB: 6dcq) binds to glycan611 and glycan637 (blue-purple sticks), away from glycan88 (green sticks) and the side chain of K241 (green sticks). Neutralization breadths were for IC<sub>50</sub> <50 µg/ml in the 208-strain panel.

(D) Structure of 2C06-BG505 complex with glycans at 241 and 230, as well as all other potential glycans modeled as mannose 5. With adjustment of glycan conformations, both glycans at 241 and 230 could be modeled without clashing with each other or with the antibody.

(E) Vaccine-elicited NHP or murine antibodies all bind at a similar location to that of VRC34.01 and ACS202. The aligned glycan241 from the ACS202 complex (green sticks) has some minor clashes with antibodies 0PV-a.01, 0PV-b.01, DF1W.01, and DFPH-a.01, shown as red disks in Pymol (<https://pymol.org/2/>). These clashes are from the terminal mannose residues and can be avoided by minor shifts of the glycan, unlike those observed in 2C06 and 2C09 and other vaccine-elicited antibodies shown in Figure 5.

**A**

| Position | Entropy | Most freq aa | 2C06                                        |                                      | 2C09                                     |                                   | A12V163-a.01                   |                                         | A12V163-b.01                                |                                         | VRC34.01 <sub>a</sub>                |                             | vFP16.02                        |                               | 0PV-c.01                                      |                                     |    |
|----------|---------|--------------|---------------------------------------------|--------------------------------------|------------------------------------------|-----------------------------------|--------------------------------|-----------------------------------------|---------------------------------------------|-----------------------------------------|--------------------------------------|-----------------------------|---------------------------------|-------------------------------|-----------------------------------------------|-------------------------------------|----|
|          |         |              | Contact atoms                               | BSA                                  | Contact atoms                            | BSA                               | Contact atoms                  | BSA                                     | Contact atoms                               | BSA                                     | Contact atoms                        | BSA                         | Contact atoms                   | BSA                           | Contact atoms                                 | BSA                                 |    |
| 512      | 0.082   | Ala (96.5)   | C, O                                        | 4.78                                 | C, O                                     | 11.9                              | N, CA, C, O, CB                | 158.6                                   | CA, C, O                                    | 20.1                                    | N(H), CA, C, O, CB                   | 127.3                       | N, CA, C, O(H), CB              | 161.6                         | N(H, S), CA, C, O, CB                         | 83.1                                |    |
| 513      | 0.275   | Val (80.6)   | N, CA, C, O, CB, CG2                        | 26.9                                 | CA, C, O, CB, CG1, CG2                   | 87.6                              | N, CA, C, O, CB, CG1, CG2      | 86.2                                    | N, CA, C, O, CB                             | 22.9                                    | N(H), CA, C, O(H), CB, CG1, CG2      | 114.5                       | N(H), CA, C, O(H), CB, CG1, CG2 | 106.9                         | N(H), CA, C, O, CB, CG1, CG2                  | 97.4                                |    |
| 514      | 0.226   | Gly (84.9)   | N, CA, C, O                                 | 19.9                                 | N, CA                                    | 11.9                              | N(H), CA, C, O(H)              | 73.7                                    | N, CA, C, O                                 | 46.4                                    | N, CA, C, O                          | 22.6                        | N(H), CA, C, O                  | 42.6                          | N, CA, C, O(H)                                | 90.7                                |    |
| 515      | 0.411   | Ile (50.0)   | N, CA, C, O, CB, CG1, CG2, CD1              | 75.6                                 | N(H), C, O(H), CB, CG1, CG2, CD1         | 30.7                              | N, CA, C, O, CB, CG1, CG2, CD1 | 154.6                                   | N, CA, C, O(H), CB, CG1, CG2, CD1           | 125.4                                   | N(H), CA, C, O(H), CB, CG1, CG2, CD1 | 153.4                       | N, CA, C, O, CB, CG1, CG2, CD1  | 140.6                         | N, CA, C, O, CB, CG1, CG2, CD1                | 134.5                               |    |
| 516      | 0.023   | Gly (99.0)   | N, CA, C, O(H)                              | 81.5                                 | N(H), CA, C, O(H)                        | 55.9                              | N, CA, C, O                    | 25.1                                    | N, CA, C, O                                 | 41.3                                    | N, CA, C, O(H), CB, CG1, CG2         | 38.7                        | N, CA, C, O                     | 38.2                          | N(H), CA, C, O(H)                             | 67.1                                |    |
| 517      | 0.043   | Ala (98.1)   | N, CA, C, O, CB                             | 31.1                                 | N, CA, C, O, CB                          | 36.3                              | N, CA, C, O, CB                | 44.8                                    | N(H), CA, C, O, CB                          | 108.9                                   | N(H), CA, C, O(H), CB                | 46.9                        | N, CA, C, O, CB                 | 40.3                          | N(H), CA, C, O(H), CB                         | 70.3                                |    |
| 518      | 0.429   | Val (45.1)   | N, CA, C, O(H), CB, CG1, CG2                | 146.2                                | N, CA, O, CB, CG1, CG2                   | 151.4                             | CA, C, CB, CG1, CG2            | 74.6                                    | N, CA, C, O, CB, CG1, CG2                   | 122.9                                   | N, CA, C, O, CB, CG1, CG2            | 91                          | N, CA, CB, CG1, CG2             | 34                            | N(H), CA, C, O, CB, CG1, CG2                  | 145.4                               |    |
| 519      | 0.183   | Phe (85.9)   | N, CA, C, O, CB, CG, CD1, CD2, CE1, CE2, CZ | 106.4                                | N, CA, O, CB, CG, CD1, CD2, CE1, CE2, CZ | 108.6                             | N, O, CG, CD1, CE1, CE2, CZ    | 67.9                                    | N, CA, C, O, CB, CG, CD1, CD2, CE1, CE2, CZ | 132.3                                   | N(H), C, O(H), CB, CG, CD1, CD2, CE2 | 72.1                        | CB, CG, CD1, CD2, CE1, CE2, CZ  | 46.2                          | N(H), CA, C, O(H), CB, CD1, CD2, CE1, CE2, CZ | 83.2                                |    |
| 520      | 0.144   | Leu (90.8)   | N, CA, O, CB, CG, CD1, CD2                  | 45.5                                 | N, O, CB, CD1                            | 65                                | CA, C, CB, CG, CD1, CD2        | 63.6                                    | N                                           | 6.02                                    | N, CA, O(H)                          | 47.7                        | CD1                             | 17.2                          | N, CA, O, CB, CG, CD1, CD2                    | 62.4                                |    |
| 535      | 0.472   | Ile (47.6)   | Met (17.6)                                  | CG                                   | 5.52                                     | SD, CE                            | 17.7                           |                                         |                                             |                                         |                                      | CG                          | 1.67                            | SD, CE                        | 26.7                                          |                                     |    |
| 85       | 0.733   | Val (49.8)   | His (2.5)                                   | N, CA, O, CB, CG, CD2, ND1, CE1, NE2 | 67.9                                     | N, CA, CB, CG, CD2, ND1, CE1, NE2 | 62.1                           | N, CA, C, O, CB, CG, CD2, ND1, CE1, NE2 | 94.6                                        | N, CA, C, O, CB, CG, CD2, ND1, CE1, NE2 | 74.4                                 | N, CB, CG1, CG2             | 40.9                            | N, CB, CG, CD2, ND1, CE1, NE2 | 43.2                                          | N(H), O, CB, CG, CD2, ND1, CE1, NE2 | 69 |
| 87       | 0.573   | Glu (52.7)   | Glu (6.8)                                   | CA, CB, CG, CD, OE1, OE2             | 77.3                                     | CB, CG, CD, OE1, OE2(H, S)        | 85.6                           | N, CA, C, O, CB, CG, CD                 | 46.2                                        | N, CA, C, O, CB, CG, CD, OE1, OE2       | 77.3                                 | N, CA, CB, CG, CD, OE1, OE2 | 39.2                            | CB, CG, CD, OE1, OE2          | 46.7                                          |                                     |    |
| 640      | 0.743   | Gly (24.8)   | Gln (1.7)                                   | CA, C, O                             | 19.2                                     |                                   |                                |                                         |                                             |                                         |                                      |                             |                                 |                               |                                               |                                     |    |
| 644      | 0.729   | Thr (26.5)   | Gly (1.7)                                   |                                      |                                          |                                   |                                |                                         |                                             |                                         |                                      |                             |                                 |                               |                                               |                                     |    |
| 648      | 0.547   | Glu (54.9)   | Glu (1.7)                                   | N, CA, CB, CG, CD, OE1               | 23.2                                     |                                   |                                |                                         |                                             |                                         |                                      |                             |                                 |                               |                                               |                                     |    |
| 651      | 0.417   | Asn (69.2)   | Asn (1.7)                                   | CB, CG, ND2                          | 28.8                                     |                                   |                                |                                         |                                             |                                         |                                      |                             |                                 |                               |                                               |                                     |    |

a – Numbers in parentheses are the percentage frequency of the amino acid in the 2020 HIV-1 group M sequences.  
 b – Hydrogen bonds or salt bridges involved with the atom are designated as H or S, respectively.  
 c – BSA, buried surface area in Å<sup>2</sup> per residue calculated with PISA. 0 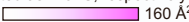 160 Å<sup>2</sup>  
 d – VRC34.01 in complex with AMC011 Env, which has a Val at position 85 instead of His.

**B** His85 interactions with 2C09

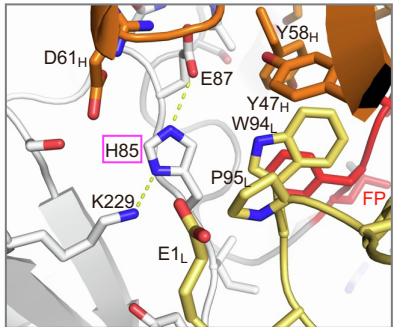

**C** His85 interactions with 0PV-c.01

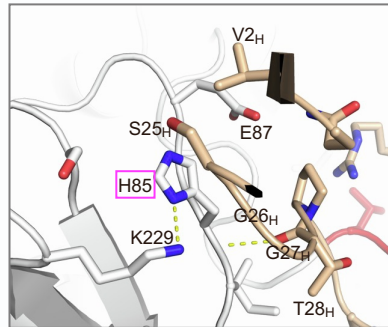

**D**

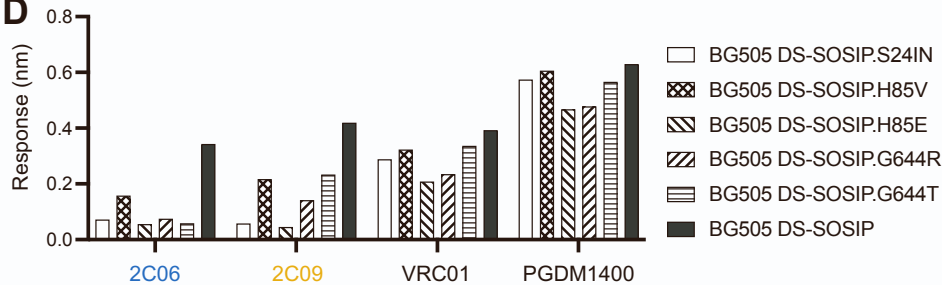

**Figure S6. Analysis of entropy and binding interactions of the epitope residues for 2C06 and 2C09 in comparison with other fusion peptide-directed antibodies, related to Figure 6.**

(A) Shannon entropy and contact surface areas of epitope residues for strain-specific and broadly neutralizing fusion peptide-directed antibodies. Residues analyzed include fusion peptide residues 512 to 520 and other residues involved in binding of 2C06 and 2C09 with normalized entropy above 0.4. Entropy values were calculated with Shannon Entropy-One ([https://www.hiv.lanl.gov/content/sequence/ENTROPY/entropy\\_one.html](https://www.hiv.lanl.gov/content/sequence/ENTROPY/entropy_one.html)) on the curated alignment of year 2020 HIV-1 M group Env of 5255 sequences (<https://www.hiv.lanl.gov/content/sequence/NEWALIGN/align.html>), and were normalized to have values between 0 and 1. Contact atoms and BSA were calculated with PISA ([https://www.ebi.ac.uk/msd-srv/prot\\_int/cgi-bin/piserver](https://www.ebi.ac.uk/msd-srv/prot_int/cgi-bin/piserver)).

(B) His85 has tight interactions with 2C09 heavy and light chain residues, similar to that in the 2C06 complex. (C) In 0PV-c.01, most interactions with H85 side chain are from heavy chain residues S25, G26, and G27. There is space and flexibility to accommodate other amino acids at position 85, despite large BSA with H85. (D) BLI assays for antibody binding to mutants of BG505 DS-SOSIP, S241N, H85V, H85E, G644R, and G644T.

**Table S1. Cryo-EM data and refinement statistics, related to Figures 2 and 3.**

|                                                 | 2C06                     | 2C09                      |
|-------------------------------------------------|--------------------------|---------------------------|
| <b>EMDB ID</b>                                  | EMD-29725                | EMD-29731                 |
| <b>PDB ID</b>                                   | 8G4M                     | 8G4T                      |
| <u>Data Collection</u>                          |                          |                           |
| Microscope                                      | FEI Titan Krios          | FEI Titan Krios           |
| Voltage (kV)                                    | 300                      | 300                       |
| Electron dose (e <sup>-</sup> /Å <sup>2</sup> ) | 58.06                    | 58                        |
| Detector                                        | Gatan K3 BioQuantum      | Gatan K2 Summit           |
| Pixel Size (Å)                                  | 0.83                     | 1.11                      |
| Defocus Range (µm)                              | -0.8/-2.0                | -1.0/-2.5                 |
| Magnification                                   | 105,000                  | 29,000                    |
| <br><u>Reconstruction</u>                       |                          |                           |
| Software                                        | cryoSPARC v3.3.1         | cryoSPARC v3.3.1          |
| Particles                                       | 645,442                  | 445,733                   |
| Symmetry                                        | C1                       | C3                        |
| Resolution (Å) (FSC <sub>0.143</sub> )          | 2.95                     | 2.81                      |
| <br><u>Refinement</u>                           |                          |                           |
| Software                                        | Phenix 1.20              | Phenix 1.20               |
| Protein residues                                | 2432                     | 2437                      |
| Ligands                                         | BMA: 7; NAG: 98; MAN: 14 | BMA: 9; NAG: 105; MAN: 15 |
| CC (box)                                        | 0.80                     | 0.83                      |
| CC (mask)                                       | 0.88                     | 0.88                      |
| R.m.s. deviations                               |                          |                           |
| Bond lengths (Å)                                | 0.003                    | 0.004                     |
| Bond angles (°)                                 | 0.459                    | 0.453                     |
| <br><u>Validation</u>                           |                          |                           |
| Molprobit score                                 | 1.55                     | 1.51                      |
| Clash score                                     | 4.25                     | 4.00                      |
| Rotamer outliers (%)                            | 2.43                     | 1.38                      |
| Ramachandran                                    |                          |                           |
| Favored regions (%)                             | 97.78                    | 96.62                     |
| Allowed regions (%)                             | 2.22                     | 3.38                      |
| Disallowed regions (%)                          | 0                        | 0                         |



**Table S2. Epitope analysis for fusion peptide-directed antibodies in comparison to non-fusion peptide antibodies, related to Figure 6.**

Epitope entropy was calculated as BSA weighted average of normalized Shannon's entropy based on 208-virus panel for the epitope residues of each antibody. Percentage of epitope overlap was calculated as number of overlapping epitope residues divided by the number of epitope residues for the antibody with the least number of epitope residues of the two. Epitope residue was defined as residue with BSA>0. Fusion peptide-directed antibodies have substantial epitope overlap, and they have similar epitope entropies, except PGT151, which binds at a slightly different location and has a lower epitope entropy. Non-fusion peptide antibodies have variable epitope entropies that correlates with neutralization breadth.

| Category         | PDB ID | Antibody | Epitope entropy | Neut breadth | Epitope BSA (Å <sup>2</sup> ) | Epitope overlap (%) with |      |    |
|------------------|--------|----------|-----------------|--------------|-------------------------------|--------------------------|------|----|
|                  |        |          |                 |              |                               | 2C06                     | 2C09 |    |
| Fusion peptide   |        | 2C06     | 0.29            | <1%          | 1268                          | 100                      | 90   |    |
|                  |        | 2C09     | 0.26            | <1%          | 1044                          | 90                       | 100  |    |
|                  |        | 6mpg     | A12V163-b.01    | 0.28         | 0%                            | 1083                     | 84   | 87 |
|                  |        | 6n1v     | A12V163-a.01    | 0.28         | 3%                            | 1055                     | 84   | 92 |
|                  |        | 6osy     | 0PV-a.01        | 0.26         | 17%                           | 1108                     | 71   | 71 |
|                  |        | 6ot1     | 0PV-b.01        | 0.26         | 13%                           | 1017                     | 67   | 57 |
|                  |        | 6nf2     | 0PV-c.01        | 0.27         | 23%                           | 1320                     | 62   | 71 |
|                  |        | 6mph     | DF1W-a.01       | 0.26         | 25%                           | 1068                     | 75   | 65 |
|                  |        | 6nc2     | ACS202          | 0.30         | 26%                           | 902                      | 62   | 74 |
|                  |        | 6cdi     | vFP16.02        | 0.24         | 31%                           | 1107                     | 69   | 81 |
|                  |        | 6nc3     | VRC34.01        | 0.27         | 50%                           | 774                      | 71   | 75 |
|                  |        | 6n1w     | DFPH-a.1        | 0.27         | 59%                           | 1179                     | 88   | 69 |
|                  | 5fuu   | PGT151   | 0.15            | 60%          | 1465                          | 54                       | 55   |    |
| V1V2             | 3u2s   | PG9      | 0.38            | 81%          |                               |                          |      |    |
|                  | 5v8l   | PGT145   | 0.31            | 75%          |                               |                          |      |    |
|                  | 5vgj   | VRC38.01 | 0.46            | 29%          |                               |                          |      |    |
| Glycan-V3        | 5aco   | PGT128   | 0.38            | 69%          |                               |                          |      |    |
|                  | 5cez   | PGT121   | 0.34            | 65%          |                               |                          |      |    |
|                  | 4jm2   | PGT135   | 0.47            | 34%          |                               |                          |      |    |
|                  | 6ozc   | 2G12     | 0.40            | 25%          |                               |                          |      |    |
| CD4-binding site | 5fyj   | VRC01    | 0.25            | 90%          |                               |                          |      |    |
|                  | 4yjd   | VRC13.01 | 0.16            | 83%          |                               |                          |      |    |
|                  | 4ydk   | VRC16.01 | 0.18            | 55%          |                               |                          |      |    |
|                  | 5f9o   | 8ANC131  | 0.20            | 53%          |                               |                          |      |    |
|                  | 4jan   | CH103    | 0.23            | 53%          |                               |                          |      |    |
|                  | 5t3z   | IOMA     | 0.23            | 50%          |                               |                          |      |    |
|                  | 5vn8   | b12      | 0.29            | 43%          |                               |                          |      |    |
| 4ye4             | HJ16   | 0.51     | 31%             |              |                               |                          |      |    |
| Silent face      | 6bf4   | VRC-PG05 | 0.60            | 28%          |                               |                          |      |    |
| Subunit          | 5cez   | 35O22    | 0.29            | 45%          |                               |                          |      |    |
| interface        | 5cix   | 8ANC195  | 0.21            | 67%          |                               |                          |      |    |

**Table S3. Analysis of antibody-trimer interfaces, by CDRs, related to Figures 2 and 3.** Subunit interface buried surface areas (Å<sup>2</sup>) were analyzed using PISA. Blank entries are 0, i.e. no binding interactions.

|             | Chain    | Protomer 1 |         | Protomer 2 |         | Protomer 3 |         | Subtotal |
|-------------|----------|------------|---------|------------|---------|------------|---------|----------|
|             |          | A gp41     | C gp120 | B gp41     | G gp120 | F gp41     | I gp120 |          |
| <b>2C06</b> | CDR H1   | 54.67      |         |            |         |            |         | 54.67    |
| Antibody 1  | CDR H2   | 164.67     | 129.49  |            |         |            |         | 294.16   |
| (chains DE) | CDR H3   | 316.52     | 14.32   |            |         | 126.34     |         | 457.18   |
|             | L N-term |            | 27.07   |            |         |            |         | 27.07    |
|             | CDR L1   |            | 87.45   |            |         |            |         | 87.45    |
|             | CDR L3   | 58.34      | 176.47  |            |         |            |         | 234.81   |
|             | FR L3    |            | 8.97    |            |         |            |         | 8.97     |
|             | DE total | 594.2      | 443.77  |            |         | 126.34     |         | 1164.31  |
| Antibody 2  | CDR H1   |            |         | 72.27      |         |            |         | 72.27    |
| (chains JK) | CDR H2   |            |         | 184.65     | 118.97  |            |         | 303.62   |
|             | CDR H3   | 204.07     |         | 280.25     | 13.11   |            |         | 497.43   |
|             | L N-term |            |         |            | 7.71    |            |         | 7.71     |
|             | CDR L1   |            |         |            | 95.57   |            |         | 95.57    |
|             | CDR L3   |            |         | 59.48      | 176.94  |            |         | 236.42   |
|             | FR L3    |            |         |            | 7.66    |            |         | 7.66     |
|             | JK total | 204.07     |         | 596.65     | 419.96  |            |         | 1220.68  |
| Antibody 3  | CDR H1   |            |         |            |         | 65.28      |         | 65.28    |
| (chains HL) | CDR H2   |            |         |            |         | 198.22     | 122.92  | 321.14   |
|             | CDR H3   |            |         | 202        |         | 255.54     | 15.73   | 473.27   |
|             | L N-term |            |         |            |         |            | 11.5    | 11.5     |
|             | CDR L1   |            |         |            |         |            | 92.69   | 92.69    |
|             | CDR L3   |            |         |            |         | 58.82      | 178.01  | 236.83   |
|             | FR L3    |            |         |            |         |            | 6.7     | 6.7      |
|             | HL total |            |         | 202        |         | 577.86     | 427.55  | 1207.41  |
| <b>2C09</b> | CDR H1   | 93.24      |         |            |         |            |         | 93.24    |
| Antibody 1  | CDR H2   | 164.88     | 98.03   |            |         |            |         | 262.91   |
| (chains DE) | CDR H3   | 256.08     | 14.32   |            |         |            |         | 270.4    |
|             | L N-term |            | 27.07   |            |         |            |         | 27.07    |
|             | CDR L1   |            | 83.25   |            |         |            |         | 83.25    |
|             | CDR L3   | 92.08      | 170.84  |            |         |            |         | 262.92   |
|             | FR L3    |            | 8.97    |            |         |            |         | 8.97     |
|             | DE total | 606.28     | 402.48  |            |         |            |         | 1008.76  |
| antibody    | CDR H1   |            |         | 92.27      |         |            |         | 92.27    |
| (chains JK) | CDR H2   |            |         | 164.61     | 100.5   |            |         | 265.11   |
|             | CDR H3   |            |         | 258.57     | 13.11   |            |         | 271.68   |
|             | L N-term |            |         |            | 7.71    |            |         | 7.71     |
|             | CDR L1   |            |         |            | 83.33   |            |         | 83.33    |
|             | CDR L3   |            |         | 88.73      | 170.05  |            |         | 258.78   |
|             | FR L3    |            |         |            | 7.66    |            |         | 7.66     |
|             | JK total |            |         | 604.18     | 382.36  |            |         | 986.54   |
| Antibody    | CDR H1   |            |         |            |         | 91.49      |         | 91.49    |
| (chains HL) | CDR H2   |            |         |            |         | 166.05     | 98.03   | 264.08   |
|             | CDR H3   |            |         |            |         | 259.94     | 15.73   | 275.67   |
|             | L N-term |            |         |            |         |            | 11.5    | 11.5     |
|             | CDR L1   |            |         |            |         |            | 83.74   | 83.74    |
|             | CDR L3   |            |         |            |         | 86.97      | 170.6   | 257.57   |
|             | FR L3    |            |         |            |         |            | 6.7     | 6.7      |
|             | HL total |            |         |            |         | 604.45     | 386.3   | 990.75   |

**Table S4. Analysis of antibody-trimer interfaces, by trimer sequence segments, related to Figures 2 and 3.** Subunit interface buried surface areas (Å<sup>2</sup>) were analyzed using PISA. Blank entries are 0, i.e. no binding interactions.

|                    |         |            | Antibody 1 DE |        | Antibody 2 JK |        | Antibody 3 HL |        |
|--------------------|---------|------------|---------------|--------|---------------|--------|---------------|--------|
| Epitope subregions |         |            | Heavy         | Light  | Heavy         | Light  | Heavy         | Light  |
| <b>2C06</b>        |         |            |               |        |               |        |               |        |
| Protomer 1         | A gp41  | FP 512-520 | 469.77        | 64.41  | 149.14        |        |               |        |
|                    |         | 524-542    | 109.63        |        |               |        |               |        |
|                    |         | 592-648    |               |        |               |        |               |        |
|                    | C gp120 | 79-88      | 125.14        | 276.3  |               |        |               |        |
|                    |         | glycan88   | 249.6         |        |               |        |               |        |
|                    |         | 227+229    |               | 45.91  |               |        |               |        |
| Protomer 2         | B gp41  | FP 512-520 | 99.28         |        | 489.37        | 67.96  | 142.4         |        |
|                    |         | 524-542    |               |        | 154.52        |        |               |        |
|                    |         | 588-648    |               |        |               |        |               |        |
|                    | G gp120 | 79-88      |               |        | 119.21        | 292.67 |               |        |
|                    |         | glycan88   |               |        | 247.2         |        |               |        |
|                    |         | 227+229    |               |        |               | 19.07  |               |        |
| Protomer 3         | F gp41  | FP 512-520 | 99.28         |        | 1180.1        | 379.7  | 455.95        | 67.28  |
|                    |         | 524-542    |               |        |               |        | 146.62        |        |
|                    |         | 644-651    |               |        |               |        |               |        |
|                    | I gp120 | 79-88      |               |        |               |        | 125.64        | 299.58 |
|                    |         | glycan88   |               |        |               |        | 246           |        |
|                    |         | 227+229    |               |        |               |        |               | 20.52  |
|                    | 241     | 22.27      |               |        |               |        |               |        |
| Subtotal           |         |            | 1073.05       | 386.62 | 1180.1        | 379.7  | 1138.9        | 387.38 |
| <b>2C09</b>        |         |            |               |        |               |        |               |        |
| Protomer 1         | A gp41  | FP 512-520 | 463.99        | 91.9   |               |        |               |        |
|                    |         | 524-542    | 70.96         |        |               |        |               |        |
|                    |         | 592-648    |               |        |               |        |               |        |
|                    | C gp120 | 85-88      | 125.14        | 279.91 |               |        |               |        |
|                    |         | glycan88   | 285           |        |               |        |               |        |
|                    |         | 229        |               | 10     |               |        |               |        |
| Protomer 2         | B gp41  | FP 512-520 | 99.28         |        | 470.71        | 90.22  |               |        |
|                    |         | 524-542    |               |        | 71.48         |        |               |        |
|                    |         | 588-648    |               |        |               |        |               |        |
|                    | G gp120 | 85-88      |               |        | 101.4         | 279.55 |               |        |
|                    |         | glycan88   |               |        | 285           |        |               |        |
|                    |         | 229        |               |        |               | 7.5    |               |        |
| Protomer 3         | F gp41  | FP 512-520 | 99.28         |        | 944.58        | 377.27 | 469.98        | 89.36  |
|                    |         | 524-542    |               |        |               |        | 71.83         |        |
|                    |         | 644-651    |               |        |               |        |               |        |
|                    | I gp120 | 85-88      |               |        |               |        | 102.66        | 276.51 |
|                    |         | glycan88   |               |        |               |        | 285           |        |
|                    |         | 229        |               |        |               |        | 0.17          | 8.55   |
|                    | 241     | 14.1       |               |        |               |        |               |        |
| Subtotal           |         |            | 964.72        | 381.81 | 944.58        | 377.27 | 943.74        | 374.42 |
